# Supplementary material
Source: publisher site journal article supplement (https://www.dovepress.com/article/445495)
Supplement: Supplementary file 1 [file get_supplementary_file.php]

## Supplementary material

### **Medical Costs Associated with High/Moderate/Low Likelihood of Adult Growth Hormone Deficiency: a Healthcare Claims Database Analysis**

**Kevin CJ Yuen<sup>1\*</sup>, Lewis S. Blevins<sup>2</sup>, David R Clemmons<sup>3</sup>, Mads Faurby<sup>4</sup>, Andrew R Hoffman<sup>5</sup>, Nicky Kelepouris<sup>6</sup>, Janice M Kerr<sup>7</sup>, Jens Magelund Tarp<sup>4</sup>, Maria Fleseriu<sup>8</sup>**

<sup>1</sup>Barrow Pituitary Center, Barrow Neurological Institute and St. Joseph's Hospital and Medical Center, University of Arizona College of Medicine and Creighton School of Medicine, Phoenix, AZ, USA;

<sup>2</sup>Department of Neurosurgery, University of California, San Francisco, CA, USA; <sup>3</sup>Department of Medicine, University of North Carolina School of Medicine, Chapel Hill, NC, USA; <sup>4</sup>Global Evidence, Pricing and Access, Novo Nordisk A/S, Søborg, Denmark; <sup>5</sup>Department of Medicine, Stanford University, Stanford, CA, USA; <sup>6</sup>Department of Medical Affairs BioPharm, CMR, Novo Nordisk Inc., Plainsboro, NJ, USA;

<sup>7</sup>Department of Endocrinology, University of Colorado Denver, Anschutz Medical Campus, Aurora, CO, USA; <sup>8</sup>Pituitary Center, Departments of Medicine and Neurological Surgery, Oregon Health and Science University, Portland, OR, USA

\*Correspondence: Kevin CJ Yuen, Barrow Pituitary Center, Barrow Neurological Institute and St. Joseph's Hospital and Medical Center, University of Arizona College of Medicine and Creighton School of Medicine, 475 N. 5th Street, Phoenix, AZ 85004, USA, Email: [Kevin.Yuen@DignityHealth.org](mailto:Kevin.Yuen@DignityHealth.org)

**Supplementary Table S1** Algorithm Criteria Used to Categorize Patients by Their Likelihood of Having AGHD [1]

| <b>Likelihood of Having AGHD</b> | <b>Algorithm Criteria for Categorization</b>                                                                                                                               |
|----------------------------------|----------------------------------------------------------------------------------------------------------------------------------------------------------------------------|
| <b>High</b>                      | ≥1 diagnosis of pre-defined conditions                                                                                                                                     |
|                                  | Diagnosis of ≥3 pituitary hormone deficiencies besides AGHD                                                                                                                |
|                                  | GH replacement therapy and absence of a non-AGHD diagnosis, or treatment with ≥3 pituitary hormones besides GH and absence of a non-AGHD diagnosis                         |
| <b>Moderate</b>                  | Not satisfying criteria for the high-likelihood group and either ≥1 diagnostic test for GHD or ≥2 pituitary hormone deficiency tests besides GH, each with unknown results |
| <b>Low</b>                       | People who did not satisfy any of the high- or moderate-likelihood criteria                                                                                                |

**Abbreviations:** AGHD, adult growth hormone deficiency; GH, growth hormone.

**Supplementary Table S2** Medical History of Individuals at the Point of Incorporation into the Truven Database

|                                                | Likelihood of Having AGHD (%) |          |      | Standardized Mean Difference |                 |                     |
|------------------------------------------------|-------------------------------|----------|------|------------------------------|-----------------|---------------------|
|                                                | High                          | Moderate | Low  | High Versus Moderate         | High Versus Low | Moderate Versus Low |
| <b>Medical history: general</b>                |                               |          |      |                              |                 |                     |
| Acute respiratory disease                      | 22.6                          | 20.7     | 18.7 | -0.05                        | -0.10           | -0.05               |
| ADHD                                           | 1.6                           | 1.2      | 1.1  | -0.03                        | -0.04           | -0.01               |
| Chronic liver disease                          | 1.9                           | 0.7      | 0.7  | -0.10                        | -0.11           | -0.01               |
| Chronic obstructive lung disease               | 2.5                           | 0.7      | 0.9  | -0.14                        | -0.12           | 0.02                |
| Crohn's disease                                | 0.4                           | 0.3      | 0.2  | -0.03                        | -0.03           | -0.01               |
| Dementia                                       | 0.3                           | 0.1      | 0.1  | -0.04                        | -0.04           | 0.00                |
| Depressive disorder                            | 10.3                          | 6.9      | 5.0  | -0.12                        | -0.20           | -0.08               |
| Diabetes mellitus                              | 10.4                          | 5.3      | 5.1  | -0.19                        | -0.20           | -0.01               |
| Gastroesophageal reflux disease                | 8.4                           | 4.2      | 3.8  | -0.17                        | -0.19           | -0.02               |
| Gastrointestinal hemorrhage                    | 2.4                           | 1.1      | 1.1  | -0.10                        | -0.10           | 0.00                |
| Human immunodeficiency virus infection         | 0.4                           | 0.2      | 0.2  | -0.03                        | -0.05           | -0.02               |
| Hyperlipidemia                                 | 24.5                          | 11.4     | 13.9 | -0.35                        | -0.27           | 0.07                |
| Hypertensive disorder                          | 24.1                          | 12.7     | 13.6 | -0.30                        | -0.27           | 0.03                |
| Lesion of liver                                | 1.0                           | 0.2      | 0.2  | -0.11                        | -0.11           | 0.00                |
| Obesity                                        | 6.0                           | 3.2      | 2.9  | -0.14                        | -0.15           | -0.02               |
| Osteoarthritis                                 | 12.7                          | 7.0      | 6.0  | -0.19                        | -0.23           | -0.04               |
| Pneumonia                                      | 2.2                           | 0.9      | 0.9  | -0.11                        | -0.11           | 0.00                |
| Psoriasis                                      | 0.8                           | 0.6      | 0.6  | -0.02                        | -0.03           | -0.01               |
| Renal impairment                               | 2.0                           | 0.6      | 0.6  | -0.13                        | -0.12           | 0.01                |
| Rheumatoid arthritis                           | 0.9                           | 0.5      | 0.5  | -0.05                        | -0.06           | -0.01               |
| Schizophrenia                                  | 0.1                           | 0.0      | 0.1  | -0.02                        | -0.02           | 0.00                |
| Ulcerative colitis                             | 0.4                           | 0.3      | 0.2  | -0.02                        | -0.03           | -0.01               |
| Urinary tract infectious disease               | 7.0                           | 5.4      | 4.4  | -0.07                        | -0.11           | -0.04               |
| Viral hepatitis C                              | 0.4                           | 0.2      | 0.2  | -0.03                        | -0.03           | 0.00                |
| Visual system disorder                         | 16.9                          | 10.0     | 9.9  | -0.20                        | -0.21           | 0.00                |
| <b>Medical history: cardiovascular disease</b> |                               |          |      |                              |                 |                     |
| Cerebrovascular disease                        | 2.9                           | 0.7      | 0.7  | -0.17                        | -0.17           | 0.00                |

|                                                                                                        |      |     |     |       |       |       |
|--------------------------------------------------------------------------------------------------------|------|-----|-----|-------|-------|-------|
| Heart disease                                                                                          | 12.2 | 5.1 | 5.1 | -0.26 | -0.26 | 0.00  |
| Atrial fibrillation                                                                                    | 1.2  | 0.4 | 0.5 | -0.08 | -0.08 | 0.01  |
| Coronary arteriosclerosis                                                                              | 3.2  | 1.3 | 1.6 | -0.13 | -0.11 | 0.02  |
| Heart failure                                                                                          | 1.2  | 0.4 | 0.4 | -0.10 | -0.09 | 0.01  |
| Ischemic heart disease                                                                                 | 2.0  | 0.9 | 1.0 | -0.10 | -0.09 | 0.01  |
| Peripheral vascular disease                                                                            | 1.0  | 0.4 | 0.4 | -0.08 | -0.07 | 0.00  |
| Pulmonary embolism                                                                                     | 0.5  | 0.1 | 0.1 | -0.07 | -0.07 | -0.01 |
| Venous thrombosis                                                                                      | 1.4  | 0.4 | 0.4 | -0.10 | -0.11 | 0.00  |
| <b>Medical history: neoplasms</b>                                                                      |      |     |     |       |       |       |
| Hematologic neoplasm                                                                                   | 4.8  | 0.4 | 0.3 | -0.28 | -0.29 | -0.02 |
| Malignant neoplastic disease                                                                           | 22.5 | 2.6 | 2.2 | -0.63 | -0.65 | -0.02 |
| Malignant lymphoma                                                                                     | 1.5  | 0.2 | 0.1 | -0.15 | -0.15 | -0.01 |
| Malignant neoplasm of anorectum                                                                        | 1.3  | 0.0 | 0.1 | -0.16 | -0.15 | 0.00  |
| Malignant tumor of breast                                                                              | 9.1  | 0.7 | 0.5 | -0.40 | -0.41 | -0.03 |
| Malignant tumor of colon                                                                               | 1.2  | 0.1 | 0.1 | -0.14 | -0.14 | 0.01  |
| Malignant tumor of lung                                                                                | 1.4  | 0.0 | 0.1 | -0.16 | -0.16 | 0.01  |
| Malignant tumor of urinary bladder                                                                     | 0.2  | 0.0 | 0.1 | -0.05 | -0.05 | 0.00  |
| Primary malignant neoplasm of prostate                                                                 | 1.6  | 0.2 | 0.2 | -0.15 | -0.14 | 0.01  |
| <b>Medical history: pituitary conditions</b>                                                           |      |     |     |       |       |       |
| Hypopituitarism                                                                                        | 0.2  | 0.0 | 0.0 | -0.07 | -0.07 | 0.00  |
| Tumor of the pituitary gland                                                                           | 5.0  | 0.1 | 0.0 | -0.31 | -0.32 | -0.04 |
| <b>Medical history: procedures</b>                                                                     |      |     |     |       |       |       |
| Hypophysectomy or excision of pituitary tumor, transnasal or transseptal approach, nonstereotactic     | 0.2  | 0.0 | 0.0 | -0.05 | -0.06 | 0.00  |
| Neuroendoscopy, intracranial; with excision of pituitary tumor, transnasal or transsphenoidal approach | 0.1  | 0.0 | 0.0 | -0.04 | -0.04 | 0.00  |
| Partial excision of pituitary gland by transsphenoidal approach                                        | 0.1  | 0.0 | 0.0 | -0.05 | -0.05 | 0.00  |
| Radiation therapy procedure or service                                                                 | 4.1  | 0.1 | 0.0 | -0.29 | -0.29 | -0.01 |

**Abbreviations:** ADHD, attention deficit hyperactivity disorder; AGHD, adult growth hormone deficiency.

**Supplementary Table S3** Use of Prescribed Medications Among Individuals at the Point of Incorporation into the Truven Database

| Medication usage                                      | Likelihood of Having AGHD (%) |          |      | Standardized Mean Difference |                 |                     |
|-------------------------------------------------------|-------------------------------|----------|------|------------------------------|-----------------|---------------------|
|                                                       | High                          | Moderate | Low  | High Versus Moderate         | High Versus Low | Moderate Versus Low |
| <b>Alimentary tract and metabolism</b>                |                               |          |      |                              |                 |                     |
| Drugs for acid-related disorders                      | 13.7                          | 8.1      | 5.8  | -0.18                        | -0.27           | -0.09               |
| Drugs used in diabetes                                | 6.9                           | 4.4      | 3.1  | -0.11                        | -0.17           | -0.07               |
| <b>Blood and blood-forming organs</b>                 |                               |          |      |                              |                 |                     |
| Antithrombotic agents                                 | 6.3                           | 1.8      | 1.6  | -0.23                        | -0.24           | -0.01               |
| <b>Cardiovascular system</b>                          |                               |          |      |                              |                 |                     |
| Diuretics                                             | 11.1                          | 7.2      | 5.6  | -0.14                        | -0.20           | -0.06               |
| Beta-blocking agents                                  | 8.4                           | 5.0      | 4.2  | -0.14                        | -0.17           | -0.04               |
| Calcium channel blockers                              | 5.6                           | 3.3      | 2.9  | -0.11                        | -0.14           | -0.02               |
| Agents acting on the renin-angiotensin system         | 13.2                          | 8.4      | 7.2  | -0.15                        | -0.20           | -0.05               |
| Lipid-modifying agents                                | 14.0                          | 7.9      | 7.1  | -0.20                        | -0.23           | -0.03               |
| <b>Dermatologicals</b>                                |                               |          |      |                              |                 |                     |
| Antipsoriatics                                        | 0.5                           | 0.3      | 0.3  | -0.02                        | -0.03           | -0.01               |
| <b>Anti-infectives for systemic use</b>               |                               |          |      |                              |                 |                     |
| Antibacterials for systemic use                       | 39.9                          | 34.4     | 29.8 | -0.11                        | -0.21           | -0.10               |
| <b>Antineoplastic and immunomodulating agents</b>     |                               |          |      |                              |                 |                     |
| Antineoplastic agents                                 | 7.7                           | 2.3      | 1.7  | -0.25                        | -0.29           | -0.05               |
| Immunosuppressants                                    | 1.7                           | 1.1      | 0.8  | -0.06                        | -0.09           | -0.03               |
| <b>Musculoskeletal system</b>                         |                               |          |      |                              |                 |                     |
| Anti-inflammatory and antirheumatic products          | 17.1                          | 13.9     | 11.8 | -0.09                        | -0.15           | -0.06               |
| <b>Nervous system</b>                                 |                               |          |      |                              |                 |                     |
| Opioids                                               | 22.2                          | 13.0     | 11.3 | -0.24                        | -0.30           | -0.05               |
| Anti-epileptics                                       | 9.9                           | 5.1      | 3.1  | -0.18                        | -0.28           | -0.10               |
| Psycholeptics                                         | 23.3                          | 13.4     | 9.2  | -0.26                        | -0.39           | -0.13               |
| Antidepressants                                       | 18.3                          | 14.3     | 9.0  | -0.11                        | -0.28           | -0.17               |
| Psychostimulants, agents used for ADHD and nootropics | 4.2                           | 2.9      | 2.0  | -0.07                        | -0.13           | -0.06               |
| <b>Respiratory system</b>                             |                               |          |      |                              |                 |                     |
| Drugs for obstructive airway diseases                 | 21.3                          | 17.3     | 13.5 | -0.10                        | -0.21           | -0.10               |

**Abbreviations:** ADHD, attention deficit hyperactivity disorder; AGHD, adult growth hormone deficiency.

**Supplementary Table S4** Summary of Cost Data Overall, By Age and By Sex for Patients with a High, Moderate, or Low Likelihood of Having AGHD

| Cost, Mean (95% CI), USD Per Month Per Patient |            | Likelihood of Having AGHD    |                           |                           | P-Values for Cost Comparisons |                 |                     |
|------------------------------------------------|------------|------------------------------|---------------------------|---------------------------|-------------------------------|-----------------|---------------------|
|                                                |            | High                         | Moderate                  | Low                       | High Versus Moderate          | High Versus Low | Moderate Versus Low |
| Overall                                        | Total      | 1844.51<br>(1841.24;1847.78) | 945.65<br>(945.26;946.04) | 459.10<br>(458.95;459.25) | <0.0001                       | <0.0001         | <0.0001             |
|                                                | Inpatient  | 477.31<br>(474.30;480.32)    | 197.33<br>(196.98;197.68) | 111.89<br>(111.74;112.03) | <0.0001                       | <0.0001         | <0.0001             |
|                                                | Outpatient | 866.89<br>(865.98;867.81)    | 518.52<br>(518.39;518.65) | 247.39<br>(247.36;247.42) | <0.0001                       | <0.0001         | <0.0001             |
|                                                | Medication | 497.14<br>(496.31;497.97)    | 227.28<br>(227.18;227.39) | 98.84<br>(98.82;98.87)    | <0.0001                       | <0.0001         | <0.0001             |
| <b>By age group (years)</b>                    |            |                              |                           |                           |                               |                 |                     |
| ≥18–<30                                        | Total      | 1503.50<br>(1487.90;1519.10) | 820.91<br>(819.85;821.97) | 276.03<br>(275.76;276.29) | <0.0001                       | <0.0001         | <0.0001             |
|                                                | Inpatient  | 474.13<br>(459.03;489.23)    | 208.27<br>(207.33;209.20) | 73.37<br>(73.11;73.63)    | <0.0001                       | <0.0001         | <0.0001             |
|                                                | Outpatient | 675.12<br>(672.59;677.65)    | 470.74<br>(470.36;471.12) | 155.19<br>(155.14;155.23) | <0.0001                       | <0.0001         | <0.0001             |
|                                                | Medication | 352.35<br>(349.51;355.19)    | 140.18<br>(139.89;140.46) | 47.07<br>(37.74;37.80)    | <0.0001                       | <0.0001         | <0.0001             |
| ≥30–<40                                        | Total      | 1563.09<br>(1557.40;1568.79) | 891.57<br>(890.86;892.28) | 346.14<br>(345.82;346.47) | <0.0001                       | <0.0001         | <0.0001             |
|                                                | Inpatient  | 425.67<br>(420.68;430.66)    | 206.04<br>(205.44;206.64) | 88.06<br>(87.74;88.38)    | <0.0001                       | <0.0001         | <0.0001             |
|                                                | Outpatient | 771.74<br>(769.76;773.72)    | 509.72<br>(509.44;510.00) | 194.55<br>(194.49;194.60) | <0.0001                       | <0.0001         | <0.0001             |
|                                                | Medication | 363.55<br>(361.77;365.34)    | 173.98<br>(173.74;174.21) | 62.95<br>(62.91;62.99)    | <0.0001                       | <0.0001         | <0.0001             |
| ≥40–<50                                        | Total      | 1797.98<br>(1792.98;1803.05) | 882.70<br>(881.94;883.46) | 430.68<br>(430.44;430.93) | <0.0001                       | <0.0001         | <0.0001             |
|                                                | Inpatient  | 422.93<br>(418.54;427.32)    | 155.13<br>(154.43;155.83) | 89.65<br>(89.42;89.88)    | <0.0001                       | <0.0001         | <0.0001             |
|                                                | Outpatient | 872.62                       | 509.14                    | 245.12                    | <0.0001                       | <0.0001         | <0.0001             |

|               |            |                              |                              |                           |         |         |         |
|---------------|------------|------------------------------|------------------------------|---------------------------|---------|---------|---------|
|               |            | (870.77;874.48)              | (508.92;509.36)              | (245.05;245.18)           |         |         |         |
|               | Medication | 499.62<br>(497.99;501.25)    | 216.29<br>(216.12;216.45)    | 95.07<br>(95.03;95.12)    | <0.0001 | <0.0001 | <0.0001 |
| ≥50–<60       | Total      | 2070.13<br>(2064.19;2076.06) | 1026.29<br>(1025.58;1027.00) | 645.58<br>(645.21;645.95) | <0.0001 | <0.0001 | <0.0001 |
|               | Inpatient  | 516.79<br>(511.34;522.25)    | 207.26<br>(206.63;207.90)    | 155.07<br>(154.71;155.43) | <0.0001 | <0.0001 | <0.0001 |
|               | Outpatient | 962.84<br>(961.13;964.54)    | 540.75<br>(540.51;540.99)    | 336.74<br>(336.67;336.82) | <0.0001 | <0.0001 | <0.0001 |
|               | Medication | 586.70<br>(585.22;588.18)    | 275.15<br>(274.96;275.35)    | 152.23<br>(152.18;152.28) | <0.0001 | <0.0001 | <0.0001 |
| ≥60–<65       | Total      | 1887.34<br>(1880.22;1894.47) | 1117.60<br>(1116.13;1119.07) | 720.96<br>(720.37;721.55) | <0.0001 | <0.0001 | <0.0001 |
|               | Inpatient  | 511.64<br>(505.22;518.06)    | 277.04<br>(275.73;278.35)    | 193.89<br>(193.32;194.46) | <0.0001 | <0.0001 | <0.0001 |
|               | Outpatient | 862.30<br>(860.10;864.51)    | 540.63<br>(540.13;541.14)    | 355.51<br>(355.38;355.64) | <0.0001 | <0.0001 | <0.0001 |
|               | Medication | 509.47<br>(507.46;511.47)    | 296.05<br>(295.65;296.45)    | 169.61<br>(169.53;169.69) | <0.0001 | <0.0001 | <0.0001 |
| <b>By sex</b> |            |                              |                              |                           |         |         |         |
| Female        | Total      | 1775.29<br>(1771.60;1778.98) | 900.51<br>(900.11;900.91)    | 521.92<br>(521.70;522.15) | <0.0001 | <0.0001 | <0.0001 |
|               | Inpatient  | 444.00<br>(440.60;447.40)    | 179.40<br>(179.00;179.70)    | 124.80<br>(124.60;125.00) | <0.0001 | <0.0001 | <0.0001 |
|               | Outpatient | 880.50<br>(879.40;881.60)    | 518.30<br>(518.20;518.50)    | 285.80<br>(285.80;285.80) | <0.0001 | <0.0001 | <0.0001 |
|               | Medication | 448.09<br>(447.15;449.04)    | 200.86<br>(200.74;200.97)    | 110.32<br>(110.29;110.35) | <0.0001 | <0.0001 | <0.0001 |
| Male          | Total      | 1955.29<br>(1949.18;1961.40) | 1058.99<br>(1058.07;1059.91) | 395.51<br>(395.31;305.71) | <0.0001 | <0.0001 | <0.0001 |
|               | Inpatient  | 530.60<br>(524.90;536.30)    | 242.50<br>(241.60;243.30)    | 98.80<br>(98.60;99.00)    | <0.0001 | <0.0001 | <0.0001 |
|               | Outpatient | 845.10<br>(843.50;846.60)    | 519.00<br>(518.70;519.30)    | 208.50<br>(208.50;208.60) | <0.0001 | <0.0001 | <0.0001 |
|               | Medication | 575.64<br>(574.10;577.17)    | 293.62<br>(293.40;293.85)    | 87.23<br>(87.20;87.26)    | <0.0001 | <0.0001 | <0.0001 |

**Abbreviations:** AGHD, adult growth hormone deficiency; CI, confidence interval.

**Supplementary Table S5** Baseline Characteristics and Incidence of Comorbidities Within 1 Year

Prior to Individuals Being Categorized into Either the High- or Moderate-Likelihood Group by Sex

| Characteristic                                | Male      | Female    | Standardized Mean Difference |
|-----------------------------------------------|-----------|-----------|------------------------------|
| <b>High likelihood of having AGHD</b>         |           |           |                              |
| Age category, years                           |           |           |                              |
| ≥18–<30                                       | 14.7      | 13.9      | –0.02                        |
| ≥30–<40                                       | 13.9      | 17.4      | 0.07                         |
| ≥40–<50                                       | 23.6      | 23.8      | 0.00                         |
| ≥50–<60                                       | 32.0      | 31.2      | –0.01                        |
| ≥60–<65                                       | 15.9      | 13.8      | –0.04                        |
| Overall measure of health, mean (SD)          |           |           |                              |
| CCI                                           | 1.5 (2.6) | 1.3 (2.4) | –0.06                        |
| CHA <sub>2</sub> DS <sub>2</sub> VASc         | 0.7 (1.0) | 1.5 (0.8) | 0.61                         |
| DCSI                                          | 1.0 (2.2) | 0.6 (2.0) | –0.13                        |
| Medical history, % <sup>a</sup>               |           |           |                              |
| Diabetes mellitus                             | 14.1      | 7.8       | –0.20                        |
| Hyperlipidemia                                | 31.8      | 19.0      | –0.30                        |
| Hypertensive disorder                         | 30.2      | 19.3      | –0.25                        |
| Urinary tract infectious disease              | 3.1       | 9.4       | 0.26                         |
| Heart disease                                 | 14.7      | 10.3      | –0.13                        |
| Coronary arteriosclerosis                     | 5.3       | 1.7       | –0.19                        |
| Ischemic heart disease                        | 3.0       | 1.4       | –0.11                        |
| Malignant neoplastic disease                  | 19.1      | 24.2      | 0.12                         |
| Malignant tumor of the breast                 | 0.1       | 14.7      | 0.58                         |
| Primary malignant neoplasm of the prostate    | 3.9       | 0.0       | –0.28                        |
| Medication use, % <sup>a</sup>                |           |           |                              |
| Drugs used in diabetes                        | 9.0       | 5.3       | –0.14                        |
| Calcium channel blockers                      | 7.4       | 4.3       | –0.13                        |
| Agents acting on the renin-angiotensin system | 18.5      | 9.3       | –0.27                        |
| Lipid-modifying agents                        | 19.9      | 9.7       | –0.29                        |
| <b>Moderate likelihood of having AGHD</b>     |           |           |                              |
| Age category, years                           |           |           |                              |
| ≥18–<30                                       | 9.6       | 21.1      | 0.23                         |
| ≥30–<40                                       | 17.5      | 25.8      | 0.14                         |
| ≥40–<50                                       | 29.7      | 32.9      | 0.05                         |
| ≥50–<60                                       | 33.7      | 18.0      | –0.26                        |
| ≥60–<65                                       | 9.5       | 2.2       | –0.22                        |
| Overall measure of health, mean (SD)          |           |           |                              |
| CCI                                           | 0.6 (1.6) | 0.3 (1.1) | –0.15                        |
| CHA <sub>2</sub> DS <sub>2</sub> VASc         | 0.4 (0.7) | 1.2 (0.5) | 0.85                         |
| DCSI                                          | 0.5 (2.0) | 0.2 (1.6) | –0.13                        |
| Medical history, % <sup>a</sup>               |           |           |                              |
| Acute respiratory disease                     | 17.7      | 22.2      | 0.11                         |
| Diabetes mellitus                             | 10.0      | 3.3       | –0.27                        |



|                                               |      |     |       |
|-----------------------------------------------|------|-----|-------|
| Human immunodeficiency virus infection        | 0.7  | 0.1 | -0.11 |
| Hyperlipidemia                                | 20.7 | 7.6 | -0.38 |
| Hypertensive disorder                         | 21.5 | 9.0 | -0.36 |
| Osteoarthritis                                | 9.1  | 6.1 | -0.11 |
| Urinary tract infectious disease              | 1.8  | 6.8 | 0.25  |
| Heart disease                                 | 8.7  | 3.6 | -0.21 |
| Coronary arteriosclerosis                     | 3.4  | 0.5 | -0.21 |
| Ischemic heart disease                        | 1.9  | 0.5 | -0.14 |
| Malignant tumor of breast                     | 0.0  | 0.9 | 0.13  |
| Primary malignant neoplasm of prostate        | 0.6  | 0.0 | -0.11 |
| Medication use, % <sup>a</sup>                |      |     |       |
| Drugs used in diabetes                        | 7.6  | 3.2 | -0.20 |
| Antithrombotic agents                         | 3.1  | 1.3 | -0.13 |
| Diuretics                                     | 9.2  | 6.3 | -0.11 |
| Beta-blocking agents                          | 7.8  | 3.8 | -0.17 |
| Calcium channel blockers                      | 6.1  | 2.1 | -0.21 |
| Agents acting on the renin-angiotensin system | 16.5 | 5.1 | -0.37 |
| Lipid-modifying agents                        | 16.7 | 4.3 | -0.41 |

**Notes:** <sup>a</sup>Summary data for main differences between the sexes in this cohort (SMD  $\geq \pm 0.1$ ).

**Abbreviations:** AGHD, adult growth hormone deficiency; CCI, Charlson Comorbidity Index; CHA<sub>2</sub>DS<sub>2</sub>VASc, score for atrial fibrillation stroke risk; DCSI, diabetes complications severity index; SD, standard deviation; SMD, standardized mean difference.

**Supplementary Figure S1** Distribution of Length of Observation Periods Normalized to the Total Number of Subjects in Each Group (High- and Moderate-Likelihood Groups).

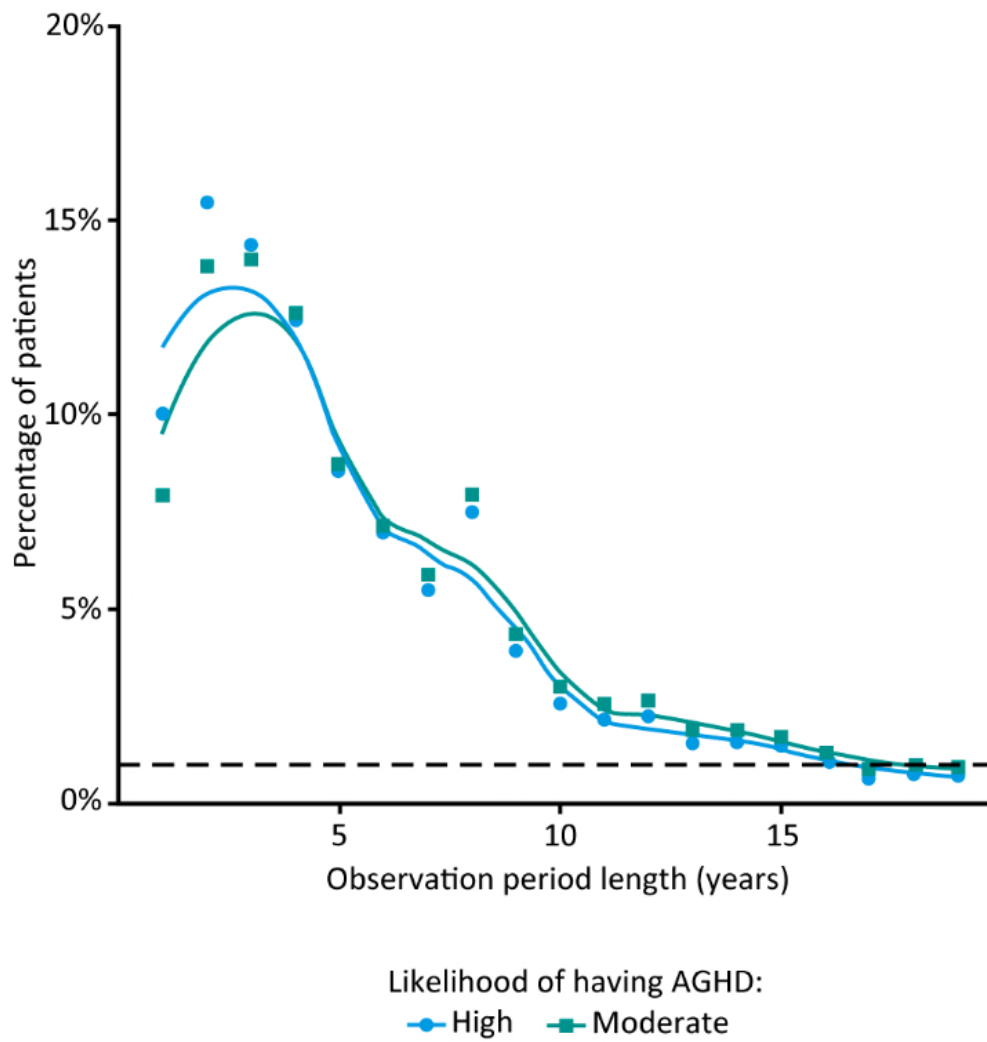

**Abbreviations:** AGHD, adult growth hormone deficiency.

**Supplementary Figure S2** Distribution of Patients at the Start and End of Observation Periods Normalized to the Total Number of Subjects in Each Group (High- and Moderate-Likelihood Groups) Relative to the Categorization Point.

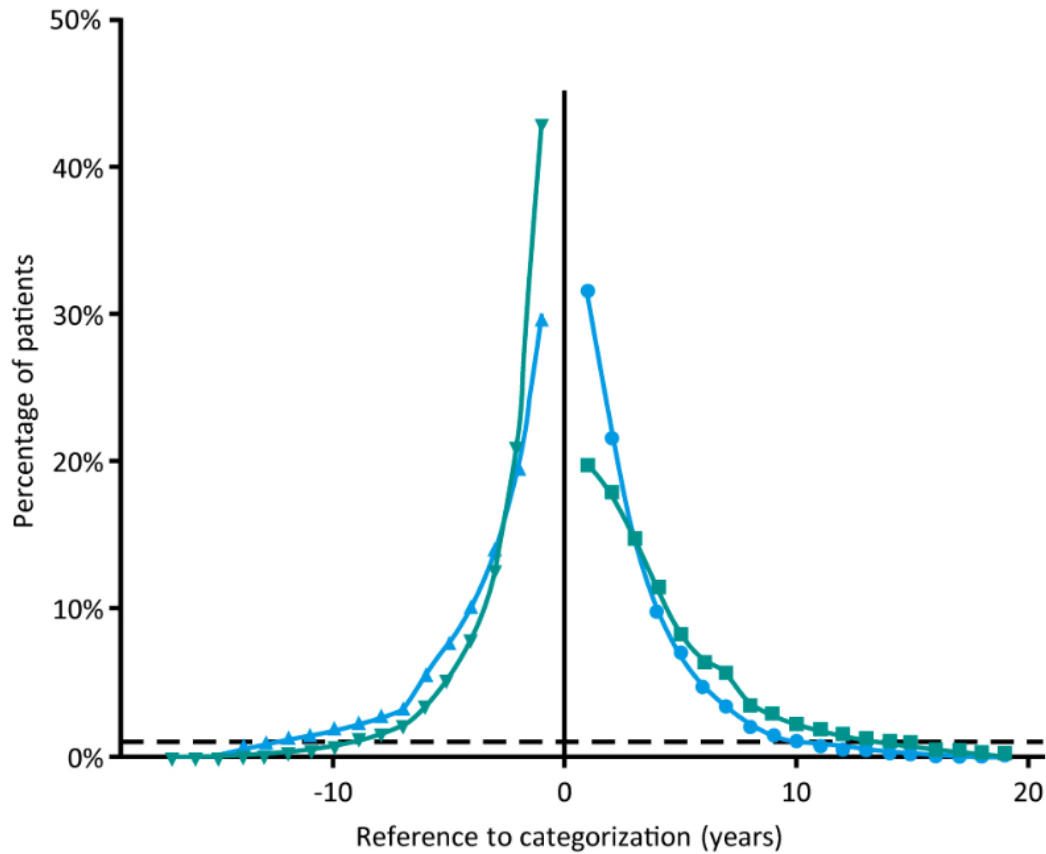

Likelihood of having AGHD (stage):

- ▲— High (start)
- High (end)
- ▼— Moderate (start)
- Moderate (end)

**Abbreviations:** AGHD, adult growth hormone deficiency.

**Supplementary Figure S3** Population mean monthly cost for people in the low- high- and moderate-likelihood group for each subgroup stratified by age.

a) Total medical monthly costs by age

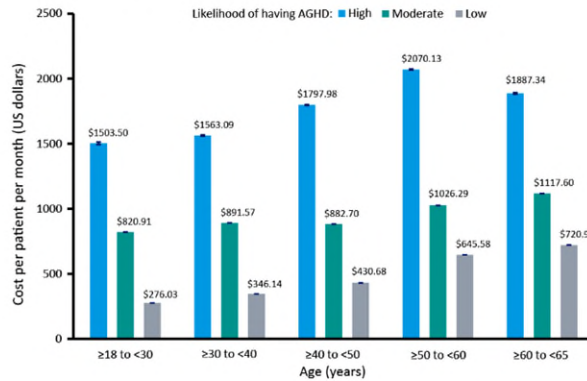

b) Mean monthly costs of visits by age

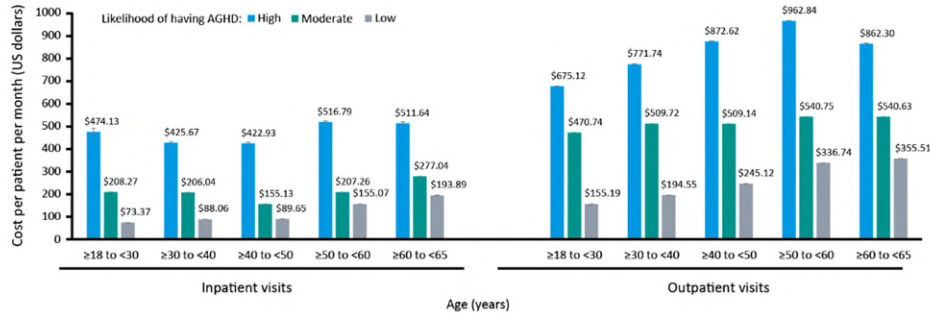

c) Mean monthly cost of medication by age

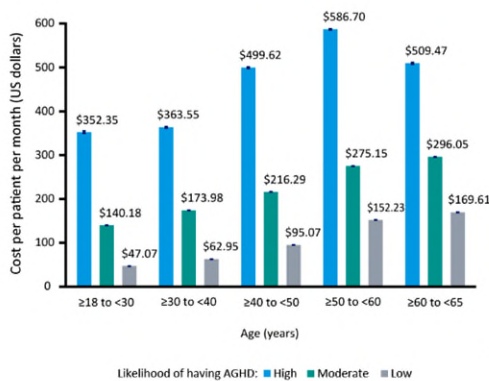

d) Contribution of healthcare elements to total

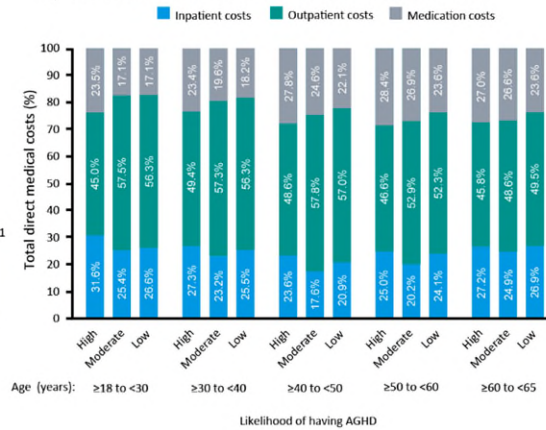

Data are presented as the average cost over the analysis period in USD (\$) per patient per month for each level of likelihood as follows: a) total medical costs, b) inpatient and outpatient costs, c) medications, and d) costs per healthcare element expressed as a percentage of the total direct medical costs (error bars indicate 95% confidence intervals).

**Abbreviations:** AGHD, adult growth hormone deficiency.

**Supplementary Figure S4** Direct medical costs stratified by sex for the high-, moderate-, and low-likelihood groups.

a) Total medical monthly costs by sex

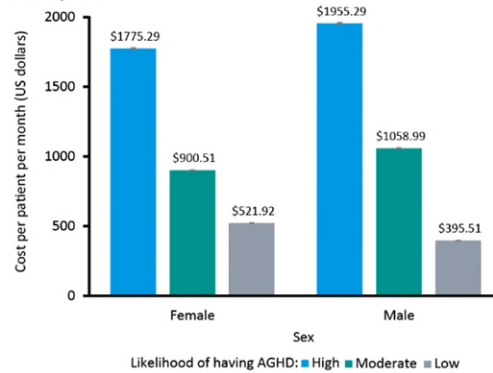

b) Mean monthly cost of visits by sex

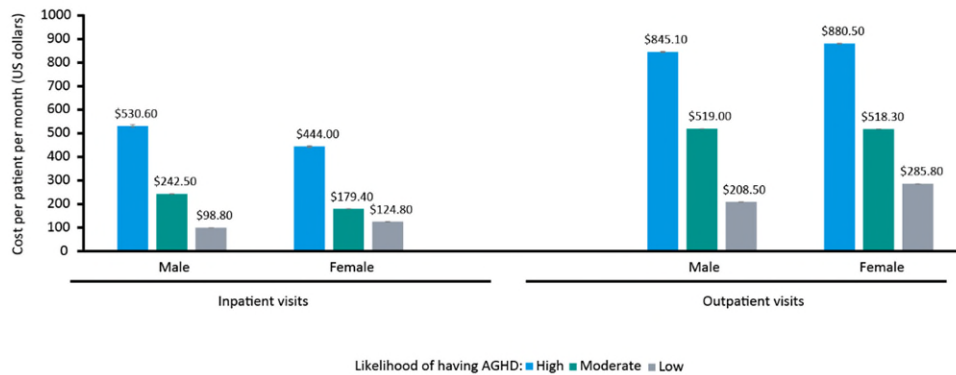

c) Mean monthly cost of medication by sex

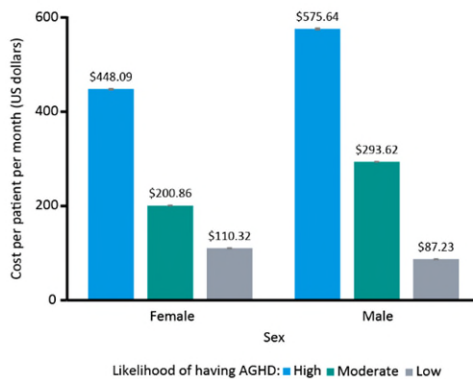

d) Contribution of healthcare elements to total monthly costs by sex

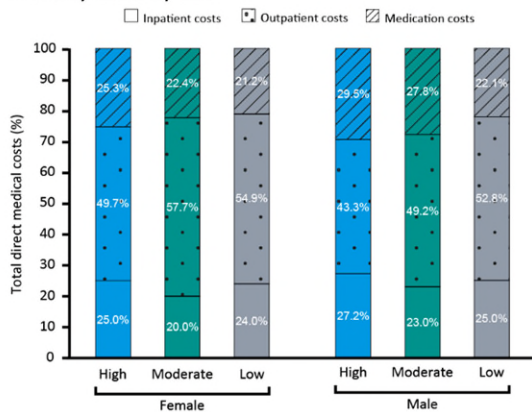

Data are presented as the average cost over the analysis period in USD (\$) per patient per month for each level of likelihood as follows: a) total medical costs, b) inpatient and outpatient costs, c) medications, and d) costs per healthcare element expressed as a percentage of the total direct medical costs (error bars indicate 95% confidence intervals).

**Abbreviations:** AGHD, adult growth hormone deficiency.

**Supplementary Figure S5** Annual inpatient and outpatient healthcare visits per patient.

a) Annual inpatient and outpatient visits by AGHD likelihood

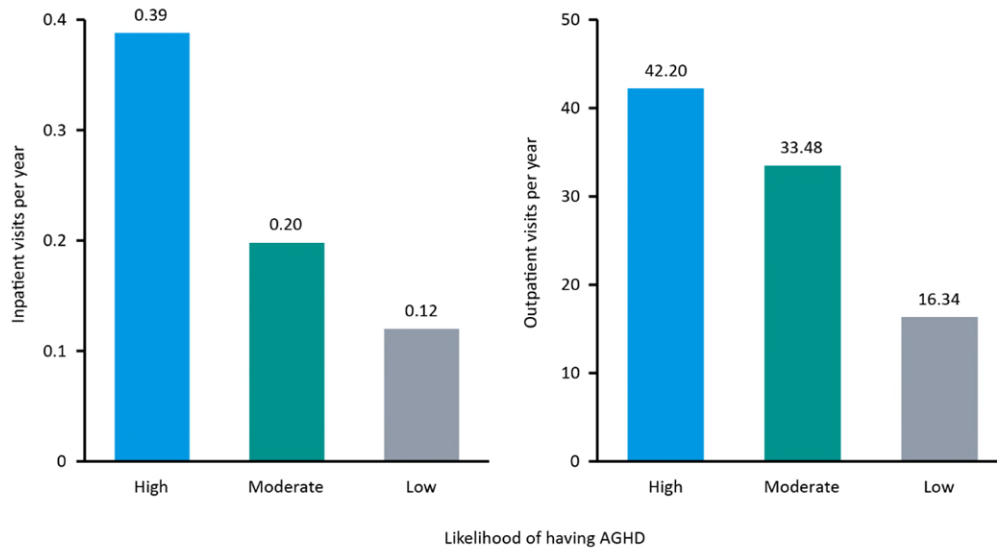

b) Annual inpatient and outpatient visits by sex

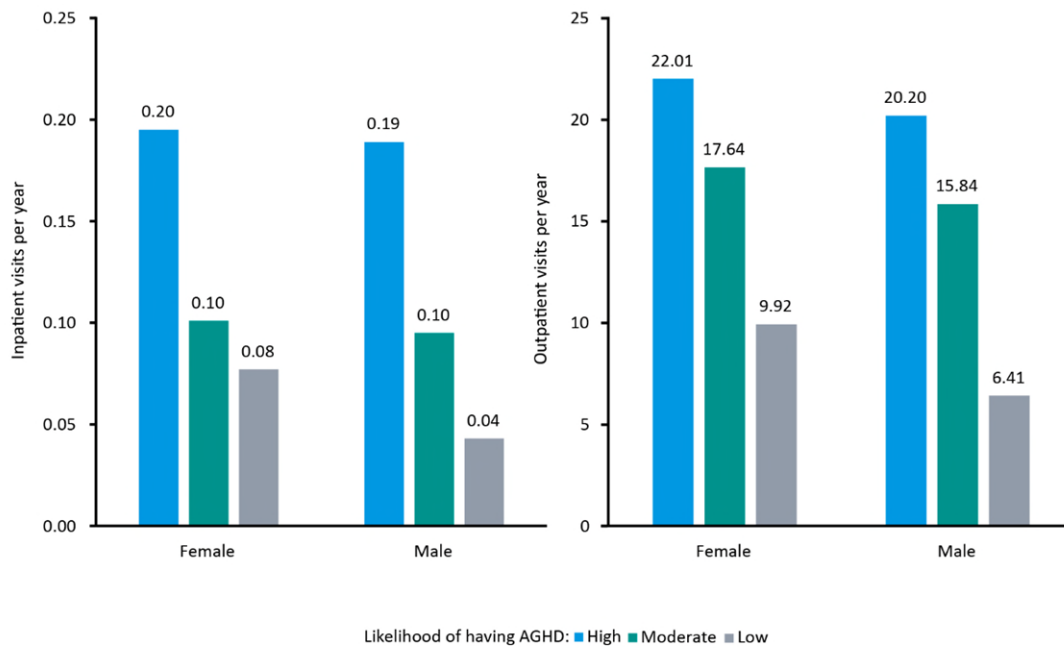

Data are presented for each likelihood group a) overall and b) by sex. Values are the average over the analysis period. Note the different scales for number of inpatient and outpatient visits per patient.

**Abbreviations:** AGHD, adult growth hormone deficiency.

**Reference:**

1. Yuen KCJ, Birkegard AC, Blevins LS, et al. Development of a novel algorithm to identify people with high likelihood of adult growth hormone deficiency in a US healthcare claims database. *Int J Endocrinol.* 2022;2022:1-9.
